# Supplementary material for: Attenuation of quorum sensing-mediated virulence in Gram-negative pathogenic bacteria: implications for the post-antibiotic era
Source: Royal Society of Chemistry journal article supplement (doi:10.1039/c4md00363b), 2014-09-30
Supplement: c4md00363b1.pdf [file c4md00363b1.pdf]

**Supplementary information**

**Attenuation of quorum sensing-mediated virulence in Gram-negative pathogenic bacteria: implications for the  
post-antibiotic era**

**Ravindra Pal Singh\***

Department of Bioscience and Biotechnology, Faculty of Agriculture, Graduate School, Kyushu University, 6-10-1, Fukuoka, 812-8581,  
Japan.

\*Corresponding author

Email: [ravindrapal.1441@gmail.com](mailto:ravindrapal.1441@gmail.com)

a

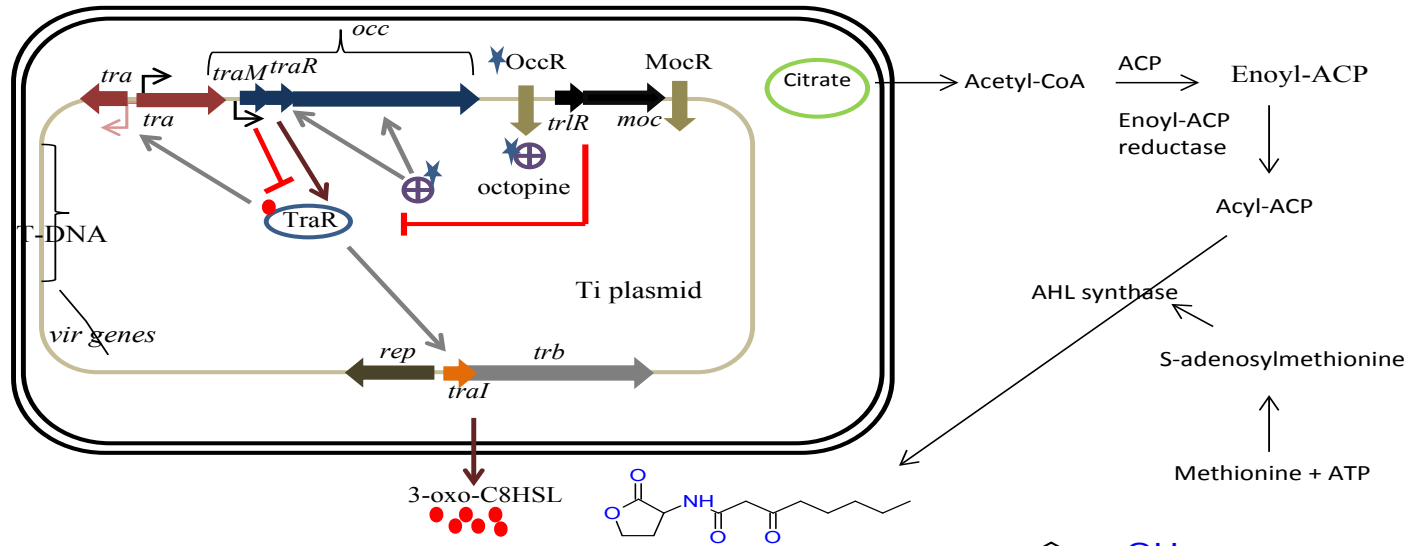

b

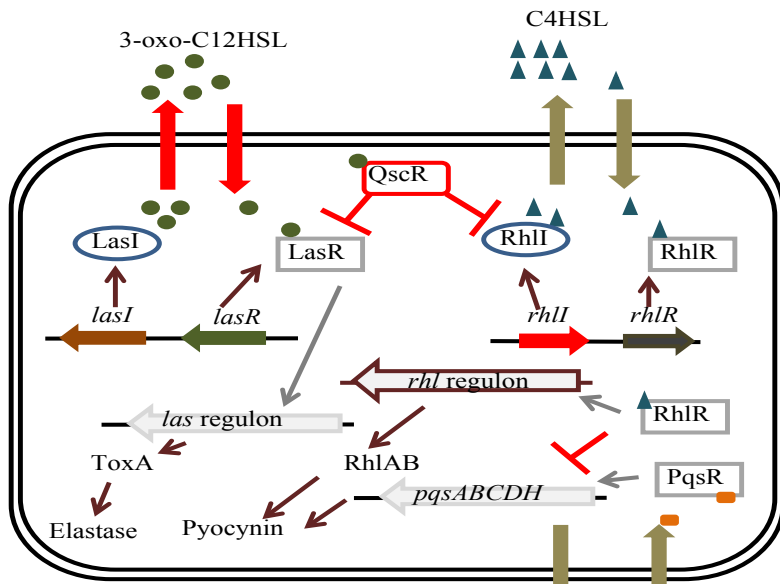

c

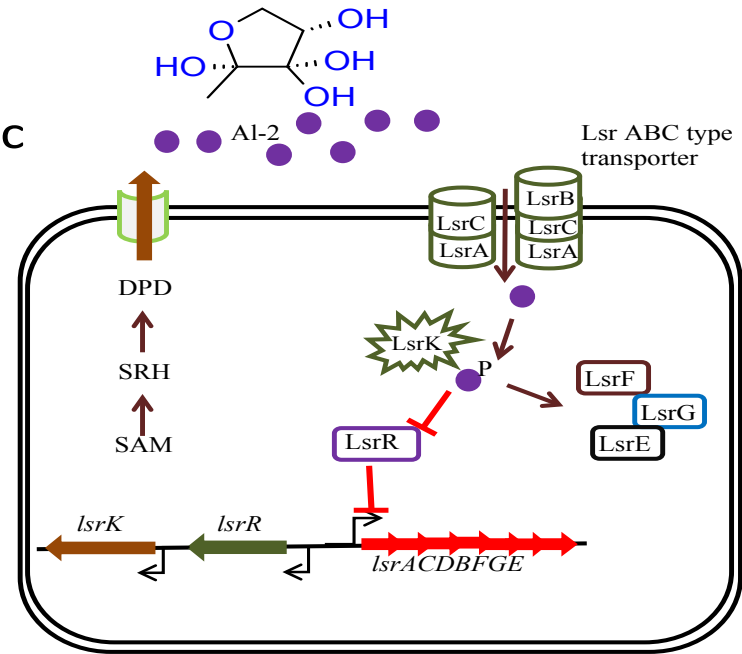

**Supplementary Fig. 1.** Gram-negative bacteria use acyl homoserine lactones (AHLs), autoinducers 2 and 3 as quorum-sensing (QS) signal molecules. At the threshold concentration, it expresses different types of products, those are responsible for acclimatising in different environmental conditions. (a) The TraI/TraR two-component QS system is present in *Agrobacterium tumefaciens*. TraI is synthesized 3-oxo-C<sub>8</sub>HSL and the TraR is response regulator.<sup>1,2</sup> The OccR intracellular receptor induces octopine import. The *traR* is present at the distal end of the *occ* operon and activates in response to cognate opine. The TraR binds to 3-oxo-C<sub>8</sub>-HSL and activates *tra* to further import 3-oxo-C<sub>8</sub>-HSL, which induces the expression of *traI*. Tra is involved in the transfer of T-DNA.<sup>3</sup> The QS system in *A. tumefaciens* is also negatively controlled by TrlR and TraM proteins.<sup>4,5</sup> The figure also shows the general mechanism of AHL production. Fatty acid synthesis and *S*-adenosylmethionine intermediates are the substrates for the LuxI-type autoinducer synthases (1). Acyl-carrier-protein (ACP).

(b) QS pathways in *Pseudomonas aeruginosa*. There are two Lux-I-R homologue systems, Las-I-R and Rhl-I-R, that produce and detect the AHL signalling molecules 3-oxo-C<sub>12</sub>-HSL and C<sub>4</sub>-HSL, respectively.<sup>6-8</sup> The Las regulon controls *toxA*, *lasA*, *lasI*, *lasB* and *aprA* and the Rhl regulon controls *lasB*, *aprA*, *rpoS* and *rhlAB* expression.<sup>6-8</sup> The third QS system is the *Pseudomonas* quinolone signal (PQS). PQS systems consist of *pqsABCDH* structure genes along with a transcriptional regulator (*pqsR*) and the response effector (*pqsE*).<sup>9</sup> HHQ/PQS is involved in the condensation of anthranilate and a  $\beta$ -keto-fatty acid. LasR positively and RhlR negatively regulate the expression of the genes involved in the PQS system. The LurR-type protein, QscR, binds to 3-oxo-C<sub>12</sub>HSL and subsequently inhibits both the *las* and *rhl* QS systems.<sup>9-11</sup>

(c) QS pathways in *Escherichia coli* and *Salmonella* Typhimurium. Autoinducer-2 is synthesised by LuxS and secreted out.<sup>12-14</sup> AI-2 is imported by the Lsr ABC-type transporter and imported AI-2 is phosphorylated by LsrK kinase.<sup>15-16</sup> Phosphorylated-AI-2 activates the QS circuit by binding to the repressor (LsrR), causing its release.<sup>15</sup> In the absence of phospho-AI-2, the repressor is bound to the *lsr* promoter region (*lsrACDBFG*) and prevents operon expression. LsrG is involved in the degradation of phospho-AI-2 and LsrE is a

putative sugar epimerase that is only present in *S. Typhimurium*.<sup>15,17</sup> S-adenosylmethionine (SAM), 4, 5-dihydroxy-2,3-pentanedione (DPD) and S-ribosylhomocysteine (SRH).

## References

- (1) L. Zhang, P. J. Murphy, A. Kerr and M. E. Tate, *Nature* 1993, **362**, 446–448.
- (2) I. Hwang, L. Pei-Li, L. Zhang, K. R. Piper, D. M., Cook, M. E., Tate and S. K. Farrand, *Proc. Natl. Acad. Sci. USA*. 1994, **91**, 4639–4643.
- (3) K. R. Piper, S. Beck von Bodman and S. K. Farrand, *Nature* 1993, **362**, 448–450.
- (4) C. Fuqua and S. C. Winans, *Mol. Microbiol.* 1996, **20**, 1199–1210.
- (5) C. E. White and S. C. Winans, *Philos. Trans. R. Soc. Lond. B. Biol. Sci.* 2007, **362**, 1135–48.
- (6) M. J. Gambello and B. H. Iglewski, *J. Bacteriol.* 1991, **173**, 3000–3009.
- (7) L. Passador, J. M. Cook, M. J. Gambello, L. Rust and B. H. Iglewski, *Science* 1993, **260**, 1127–1130.
- (8) J. P. Pearson, K. M. Gray, L. Passador, K. D. Tucker, A. Eberhard, B. H. Iglewski and E. P. Greenberg, *Proc. Natl. Acad. Sci. USA* 1994, **91**, 197–201.
- (9) L. A. Gallagher, S. L. McKnight, M. S. Kuznetsova, E. C. Pesci and C. Manoil, *J. Bacteriol.* 2002, **184**, 6472–6480.
- (10) E. C. Pesci, J. B. Milbank, J. P. Pearson, S. McKnight, A. S. Kende, E. P. Greenberg and B. H. Iglewski, *Proc. Natl. Acad. Sci. USA* 1999, **96**, 11229–11234.
- (11) J. F. Dubern and S. P. Diggle, *Mol. Biosyst.* 2008, **4**, 882–888.
- (12) S. Schauder, K. Shokat, M. G. Surette B. L. Bassler, *Mol. Microbiol.* 2001, **41**, 463–476.
- (13) V. Sperandio, A. G. Torres, B. Jarvis, J. P. Nataro and J. B. Kaper, *Proc. Natl. Acad. Sci. USA* 2003, **100**, 8951–8956.

- (14) K. Winzer, K. R. Hardie, N. Burgess, N. Doherty, D. Kirke, M. T. Holden, R. Linfoth, K. A. Cornell, A. J. Taylor, P. J. Hill and P. Williams, *Microbiology* 2002, **148**, 909–922.
- (15) M. E. Taga, S. T. Miller and B. L. Bassler, *Mol. Microbiol.* **50**, 1411–1427.
- (16) B. M. Ahmer, *Mol. Microbiol.* 2004, **52**, 933–45.
- (17) K. B. Xavier and B. L. Bassler, 2005 *J. Bacteriol.* **187**, 238–48.
